# Supplementary material for: Energy transfer in hybrid Langmuir–Blodgett films of iridium complexes and synthetic saponite: dependence of transfer efficiency on the interlayer distance
Source: Royal Society of Chemistry journal article supplement (doi:10.1039/c4nj00818a), 2014-07-24
Supplement: c4nj00818a1.pdf [file c4nj00818a1.pdf]

## Supplementary Information

### **Energy Transfer in Hybrid Langmuir-Blodgett Films of Iridium Complexes and Synthetic Saponite: Dependence of Transfer Efficiency on Interlayer Distance**

**Hisako Sato,<sup>a,\*</sup> Miwa Ochi,<sup>a</sup> Masaru Kato,<sup>b</sup> Kenji Tamura<sup>c</sup> and Akihiko Yamagishi<sup>d</sup>**

<sup>a</sup> Department of Chemistry, Graduate School of Science and Engineering, Ehime University, Matsuyama 790-8577, Japan, [sato.hisako.my@ehime-u.ac.jp](mailto:sato.hisako.my@ehime-u.ac.jp)

<sup>b</sup> Division of Environmental Materials Science Graduate School of Environmental Science, Hokkaido University, Sapporo, 060-0810, Japan

<sup>c</sup> National Institute of Materials Science, Tsukuba 305-0044, Japan

<sup>d</sup> Department of Chemistry, Toho University, Funabashi, Chiba 274-851, Japan

#### Contents

- 1. The UV-visible spectra of the hybrid films and solutions**
- 2. The FTIR spectra of the hybrid LB films**
- 3. The dynamic emission properties of the hybrid films**
- 4. The model calculation of energy transfer rates in hybrid films with holes**
- 5. The photographic images of the quartz substrates covered with single- and multi-layered hybrid films**
- 6. Calculation of spectral overlap integral ( $J$ ) and Förster radius ( $R_0$ )**

## 1. The UV-visible spectra of the hybrid films and solutions

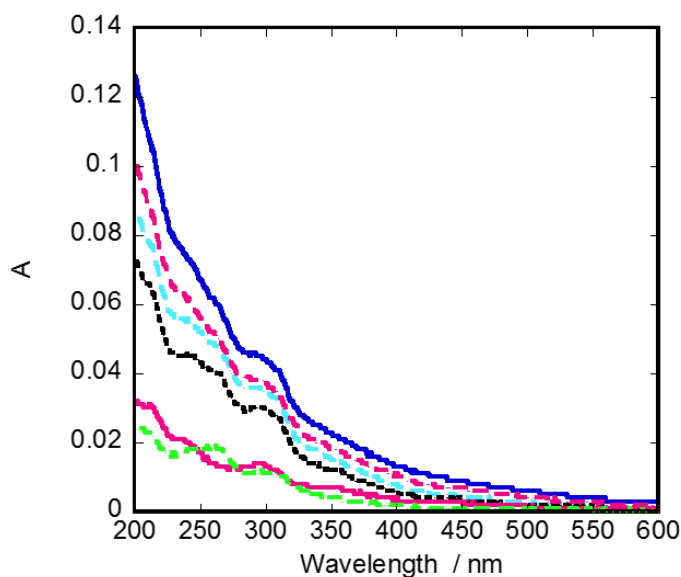

**Figure S1(a).** The UV-visible spectra of the hybrid LB films deposited onto quartz substrates. The film composition for each curve was following: (green) {DFPPY/SAP}, (red solid line) {PIQ/SAP}, (black) {DFPPY/SAP}/{PIQ/SAP}, (sky blue) {DFPPY/SAP}/ {SA/SAP} /{PIQ/SAP}, (red) {DFPPY/SAP}/ {SA/SAP}<sub>2</sub> /{PIQ/SAP} and (blue) {DFPPY/SAP}/ {SA/SAP}<sub>3</sub> /{PIQ/SAP}.

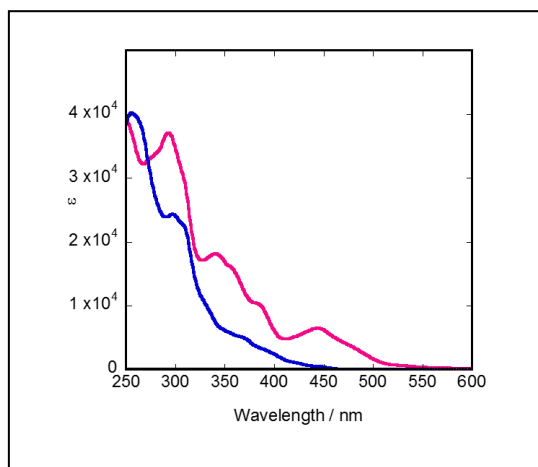

**Figure S1 (b).** The UV-visible spectra of [Ir(dfppy)<sub>2</sub>(dc9bpy)]ClO<sub>4</sub> (blue) and [Ir(piq)<sub>2</sub>(dc9bpy)] ClO<sub>4</sub> (red) in CHCl<sub>3</sub>.

## 2. The FTIR spectra of the hybrid LB films

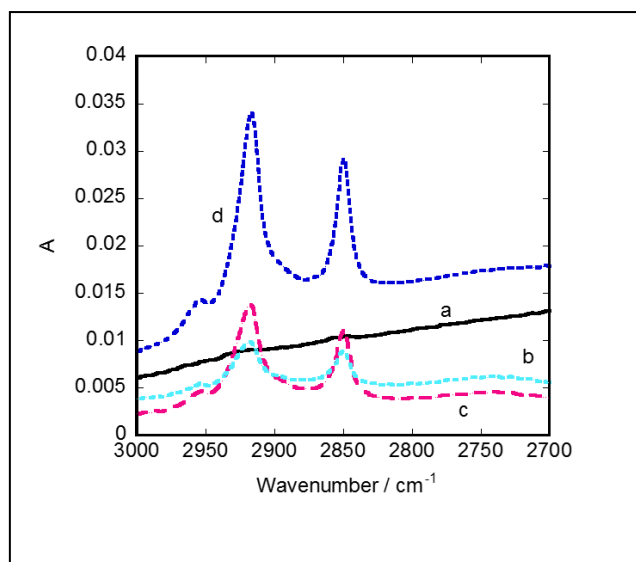

**Figure S2.** The FTIR spectra of the hybrid LB films deposited onto quartz substrates. The film composition for each curve was following: (black) {DFPPY/SAP}/{PIQ/SAP}, (sky blue) {DFPPY/SAP}/{SA/SAP}/{PIQ/SAP}, (red) {DFPPY/SAP}/{SA/SAP}<sub>2</sub>/{PIQ/SAP} and (blue) {DFPPY/SAP}/{SA/SAP}<sub>3</sub>/{PIQ/SAP}.

### 3. Dynamic emission properties of the hybrid films

Table S1. The lifetime analyses for the emission at 490 nm according to eq. (1) in the text

| Hybrid<br>LB film                            | lifetime ( $\mu\text{s}$ ) |                  |          |          |
|----------------------------------------------|----------------------------|------------------|----------|----------|
|                                              | Fast( $\tau_1$ )           | Slow( $\tau_2$ ) | F1(fast) | F2(slow) |
| {DFPPY/SAP}                                  | 0.65                       | 1.52             | 0.020    | 0.008    |
| {DFPPY/SAP}/{PIQ/ SAP}                       | 0.11                       | 0.57             | 0.013    | 0.012    |
| {DFPPY/SAP}/{SA/SAP} <sub>1</sub> /{PIQ/SAP} | 0.18                       | 0.68             | 0.011    | 0.009    |
| {DFPPY/SAP}/{SA/SAP} <sub>2</sub> /{PIQ/SAP} | 0.26                       | 0.90             | 0.007    | 0.007    |
| {DFPPY/SAP}/{SA/SAP} <sub>3</sub> /{PIQ/SAP} | 0.37                       | 1.11             | 0.009    | 0.007    |
| {DFPPY/SAP}/{SA/SAP} <sub>4</sub> /{PIQ/SAP} | 0.55                       | 1.44             | 0.010    | 0.006    |

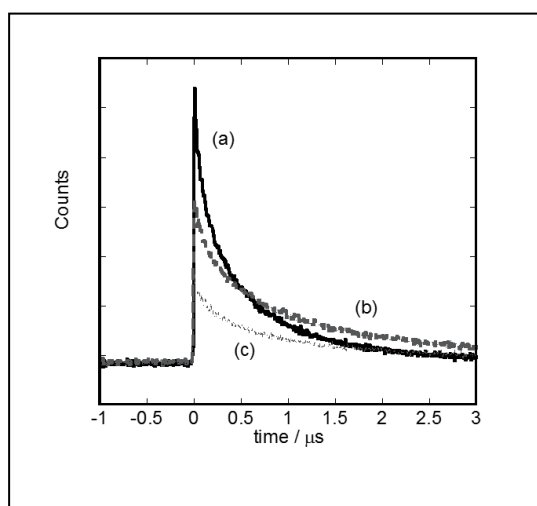

**Figure S3.** The lifetime of emission at 590 nm from multi-layered hybrid LB films. The film composition for each curve was following: (a) {DFPPY/SAP}/{PIQ/SAP}, (b) {DFPPY/SAP}/{SA/SAP}/{PIQ/SAP} and (c) {DFPPY/SAP}/{SA/SAP}<sub>2</sub>/{PIQ/SAP}.

#### 4. The model calculation of energy transfer rates in hybrid films with holes

(i) The relative value of energy transfer rate ( $k_{ET}$ ) was calculated for the model multi-layered hybrid films. In each film, it was assumed that the  $n$ th intervening layer of {SA/SAP} possesses a hole with the width  $a_n$  and the depth of one layer thickness (see a drawing below the plot). The interlayer distance,  $d_n$  (denoted as  $R_d$  in the text) was assumed to be  $3.0 + 1.81n$  in nm for  $n=0 \sim 5$ .

| Number of inserted [SA/clay] layers (n) | $d_n$ /nm | Hole size/ nm ( $a_n$ ) | Formula for calculating $k_{ET}$ values       | $k_{ET}$ (relative value) |
|-----------------------------------------|-----------|-------------------------|-----------------------------------------------|---------------------------|
| 0                                       | 3         | 0                       | $1/d_0^4$                                     | 0.01235                   |
| 1                                       | 4.81      | 1                       | $1/d_0^4 - 1/(d_0 + a_1)^4 + 1/(d_1 + a_1)^4$ | 0.00932                   |
| 2                                       | 6.62      | 0.4                     | $1/d_1^4 - 1/(d_1 + a_2)^4 + 1/(d_2 + a_2)^4$ | 0.00527                   |
| 3                                       | 8.43      | 0.3                     | $1/d_2^4 - 1/(d_2 + a_3)^4 + 1/(d_3 + a_3)^4$ | 0.00409                   |
| 4                                       | 10.24     | 0.2                     | $1/d_3^4 - 1/(d_3 + a_4)^4 + 1/(d_4 + a_4)^4$ | 0.00289                   |
| 5                                       | 12.05     | 0.01                    | $1/d_4^4 - 1/(d_4 + a_5)^4 + 1/(d_5 + a_5)^4$ | 0.00021                   |

(ii) The plot of the calculated  $k_{ET}$  versus the inverse of the interlayer distance ( $d_n$ ) between {DFPPY/SAP} and {PIQ/SAP}. The right figure shows the drawing of a model film with holes.

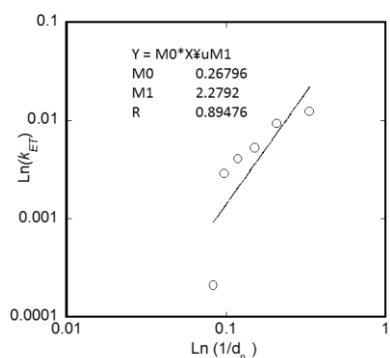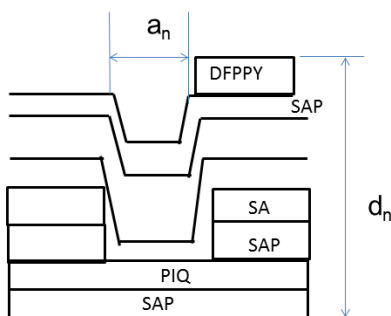

## 5. The photographic images of the quartz substrates covered with single- and multi-layered hybrid films

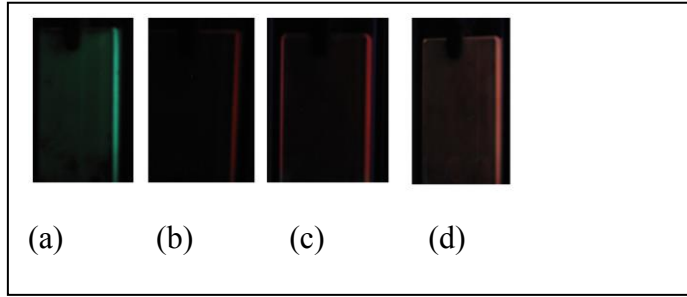

Figure S4. The emission in vacuum under the irradiation of UV-light: (a) {DFPPY/SAP}, (b) {PIQ/SAP}, (c) {DFPPY/SAP}/{PIQ/SAP} and (d) {DFPPY/SAP}/{SA/SAP}<sub>5</sub>{PIQ/SAP}

## 6. Calculation of spectral overlap integral (J) and Förster radius (R<sub>0</sub>)

The rate constant of Förster-type energy transfer ( $k_{ET}$ ) is expressed by the following equation:

$$k_{ET} = \frac{9000 \text{ Ln}10 \kappa^2 \Phi}{128 \pi^5 n^4 N \tau_D R^6} J(\lambda) \quad (\text{S1})$$

in which  $\tau_D$ ,  $R_0$ ,  $R$  and  $J(\lambda)$  denote the excited life time of a donor in the absence of an acceptor, Förster radius, the donor/acceptor distance and the spectral overlap integral, respectively.  $R_0$  is given by:

$$R_0 = 9.78 \times 10^{-5} (\kappa^2 \Phi n^{-4} J(\lambda))^{\frac{1}{6}} \quad (\text{in cm}) \quad (\text{S2})$$

$J(\lambda)$  is given by:

$$J(\lambda) = \frac{\int F_d(\lambda) \varepsilon(\lambda) \lambda^4 d\lambda}{\int F_d(\lambda) d\lambda} \quad (\text{S3})$$

$$k_{ET} = \frac{1}{\tau_D} \left( \frac{R_0}{R} \right)^6 \quad (S4)$$

$$\eta_{ET} = k_{ET} / (k_{ET} + k_{NR}) \quad (S5)$$

As for other parameters in equations (S2) and (S3),  $\kappa$  is the orientation factor,  $\phi$  the quantum yield of donor,  $n$  the refractive index of the medium,  $N$  the Avogadro constant,  $\lambda$  the wavelength,  $\varepsilon_a$  the extinction coefficient of the acceptor and  $F_d$  the normalized emission intensity of the donor.  $\eta_{ET}$  denotes the energy transfer efficiency and  $k_{NR}$  represented the decay constant in the absence of an acceptor.  $J(\lambda)$  was calculated to be  $1.14 \times 10^{-14} \text{ M}^{-1}\text{cm}^3$  from the emission and absorption spectra of the present donor-acceptor pairs. Assuming  $\kappa^2 = 2/3$  (random orientation),  $n = 1.3$  and  $\phi = 0.14$ ,  $R_0$  was obtained to be 2.62 nm. Inserting this value and  $\tau_D = 0.65 \text{ } \mu\text{s}$  (experimentally obtained),  $k_{ET}$  was calculated to be  $6.85 \times 10^5 \text{ s}^{-1}$  at  $R = 3.0 \text{ nm}$  from eq. (S4).
